# Supplementary material
Source: Royal Society of Chemistry journal article supplement (doi:10.1039/d6ay00462h)
Supplement: d6ay00462h1.pdf [file d6ay00462h1.pdf]

## Electronic Supplementary Materials

# A novel peroxidase-mimicking Cu, S co-doped carbon dot nanozyme for dual-mode lactate biosensing in serum and sweat

Ali M. Alaseem<sup>a</sup>, Glowi Alasiri<sup>b</sup>, Razan Orfali<sup>b</sup>, Ramadan Ali<sup>c</sup>, Al-Montaser Bellah H.

Ali<sup>d</sup>, Mohamed M. El-Wakil<sup>e\*</sup>

<sup>a</sup> Department of pharmacology College of Medicine, Imam Mohammad Ibn Saud Islamic University (IMSIU), Riyadh 13317, Saudi Arabia

<sup>b</sup> Department of Biochemistry, College of Medicine, Imam Mohammad Ibn Saud Islamic University (IMSIU), Riyadh, 13317, Saudi Arabia.

<sup>c</sup> Department of Pharmaceutical Chemistry, Faculty of Pharmacy, University of Tabuk, Tabuk 71491, Saudi Arabia

<sup>d</sup> Department of Pharmaceutical Analytical Chemistry, Faculty of Pharmacy, Assiut University, Assiut, 71526, Egypt

<sup>e</sup> Pharmaceutical Chemistry Department, Faculty of Pharmacy, Badr University in Assiut (BUA), 2014101, Assiut, Egypt

### Correspondence

\* [mohamed.elwakeel@pharm.aun.edu.eg](mailto:mohamed.elwakeel@pharm.aun.edu.eg), [mohamed.mohamoud@ymail.com](mailto:mohamed.mohamoud@ymail.com)

## Instruments

UV-visible absorption spectra were recorded using a Shimadzu 1601 PC UV-Vis spectrophotometer, whereas the concentrations of Cu were determined by inductively coupled plasma atomic emission spectroscopy (ICP-AES) using a PerkinElmer instrument. Fluorescence excitation and emission spectra were recorded using a Shimadzu RF-5301 PC spectrofluorometer equipped with a quartz cuvette and operated at a slit width of 3 nm. The morphology of the Cu, S@CDs was examined by transmission electron microscopy (TEM) using a JEOL JEM-100CX II instrument. Particle size and polydispersity were determined by dynamic light scattering (DLS) using a Zetasizer Nano ZS instrument. In addition, the elemental composition and surface chemical states of the prepared materials were analyzed by X-ray photoelectron spectroscopy (XPS) with an ESCA ULVAC-PHI 1600 spectrometer. The crystalline structure of the synthesized material was analyzed by powder X-ray diffraction (PXRD) on a PW 1710 diffractometer, while its vibrational characteristics were further investigated by micro-Raman spectroscopy. Surface functional groups were identified by FT-IR using a Nicolet™ iS™10 spectrometer, whereas elemental composition was evaluated by EDX with a NEX QC+ QuantEZ system.

## Fluorescence quantum yield measurements of Cu-S@CDs

Quantum yields ( $\Phi_X$ ) were determined relative to quinine sulfate standard (QY = 54% in  $H_2SO_4$  at 310 nm) under identical instrumental settings. To avoid inner-filter effects, sample and reference absorbance values were kept below 0.05 at 315 nm. Emission spectra were integrated over the full fluorescence band (corrected for instrument response), and the following relation was applied:

$$\phi_X = \phi_S \times \frac{F_{Cu-S@CDs}}{F_S} \times \frac{A_S}{A_{Cu-S@CDs}} \times \frac{\eta_{Cu-S@CDs}}{\eta_S}$$

$\Phi_X$  represents the quantum yield of Cu-S@CDs,  $\phi_S$  represents the quantum yield of quinine sulfate,  $F_X$  is the fluorescence intensity of Cu-S@CDs,  $F_S$  is the fluorescence intensity of standard (S, quinine sulfate), A refers to the absorbance value and  $\eta$  refers to the refractive index of the solvent ( $H_2SO_4$ ). The synthesized Cu-S@CDs were dissolved in distilled water ( $\eta = 1.33$ ) and S was dissolved in  $H_2SO_4$  ( $\eta = 1.33$ ).

## Catalytic kinetics

The catalytic behavior of Cu-S@CDs was evaluated by measuring the absorbance of the oxidized product at 654 nm. Steady-state kinetic studies were carried out under two different substrate regimes: by varying the concentration of H<sub>2</sub>O<sub>2</sub> (0.1–2.2 mM) while maintaining the TMB concentration at 12 mM, and by varying the TMB concentration (2–26 mM) at a fixed H<sub>2</sub>O<sub>2</sub> concentration of 0.8 mM. The kinetic parameters, namely the Michaelis constant (K<sub>m</sub>) and maximum reaction velocity (V<sub>max</sub>), were calculated from the Michaelis–Menten equation and corresponding Lineweaver–Burk plots, where V denotes the initial reaction rate and [S] represents the substrate concentration.

$$V = V_{\max} \times [S] / (K_m + [S]) \quad (1)$$

$$1/V = (K_m/V_{\max}) (1/[S]) + (1/V_{\max}) \quad (2)$$

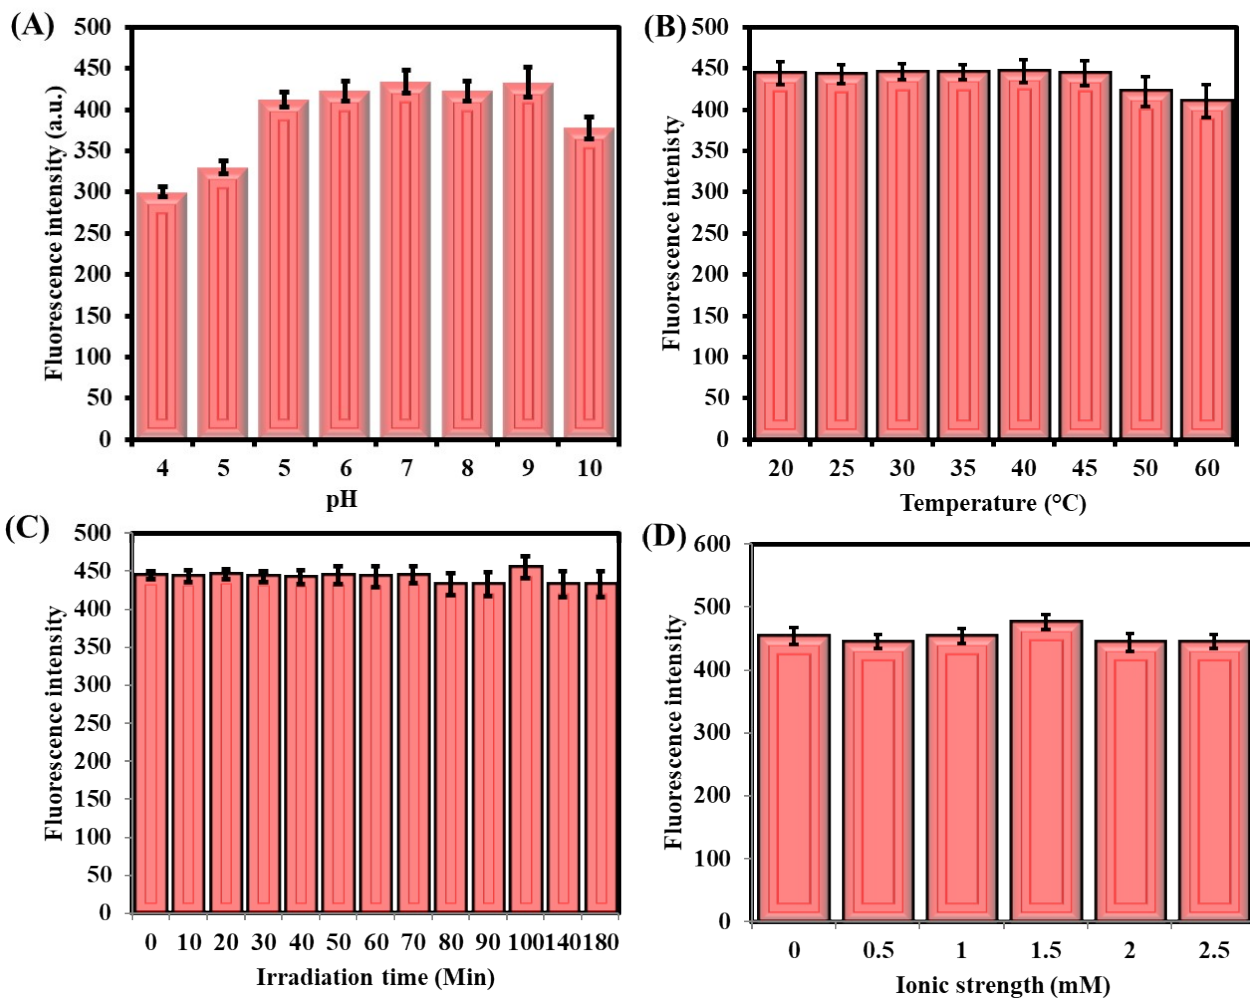

**Fig. S1** Stability of Cu-S@CDs under different conditions.

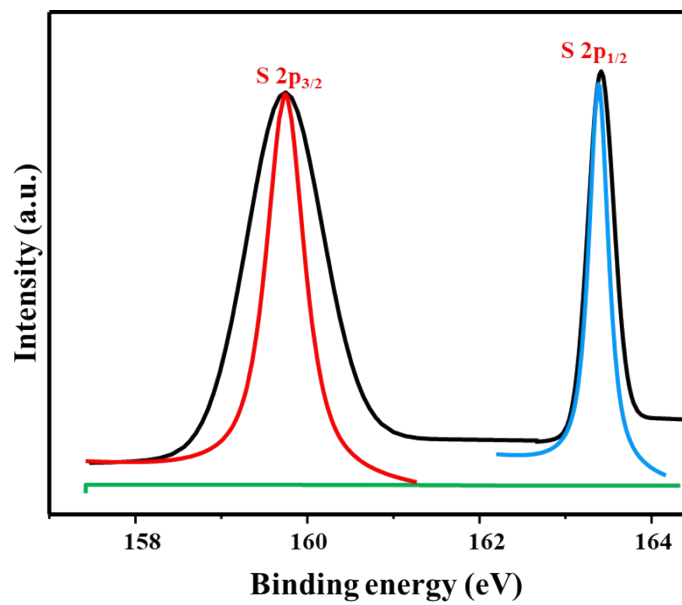

**Fig. S2** High resolution spectrum of S 2p.

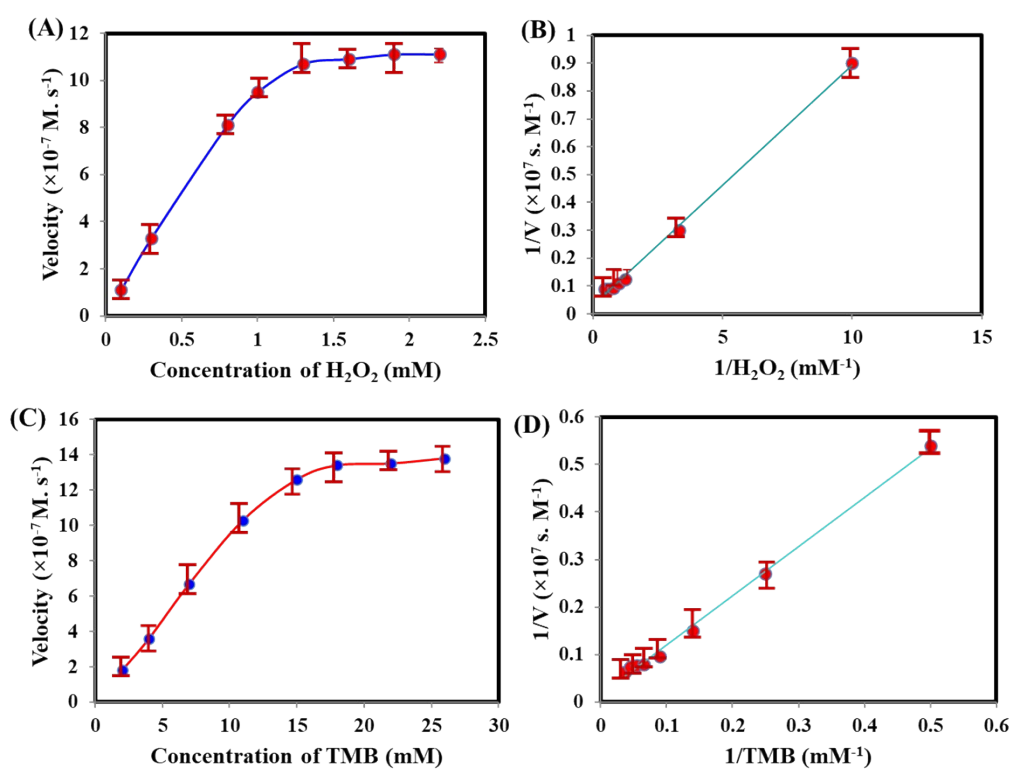

**Fig. S3** Steady-state kinetic behavior of Cu-S@CDs analyzed using Michaelis–Menten plots (A, C) and Lineweaver–Burk plots (B, D). Number of replicates for all determinations are four.

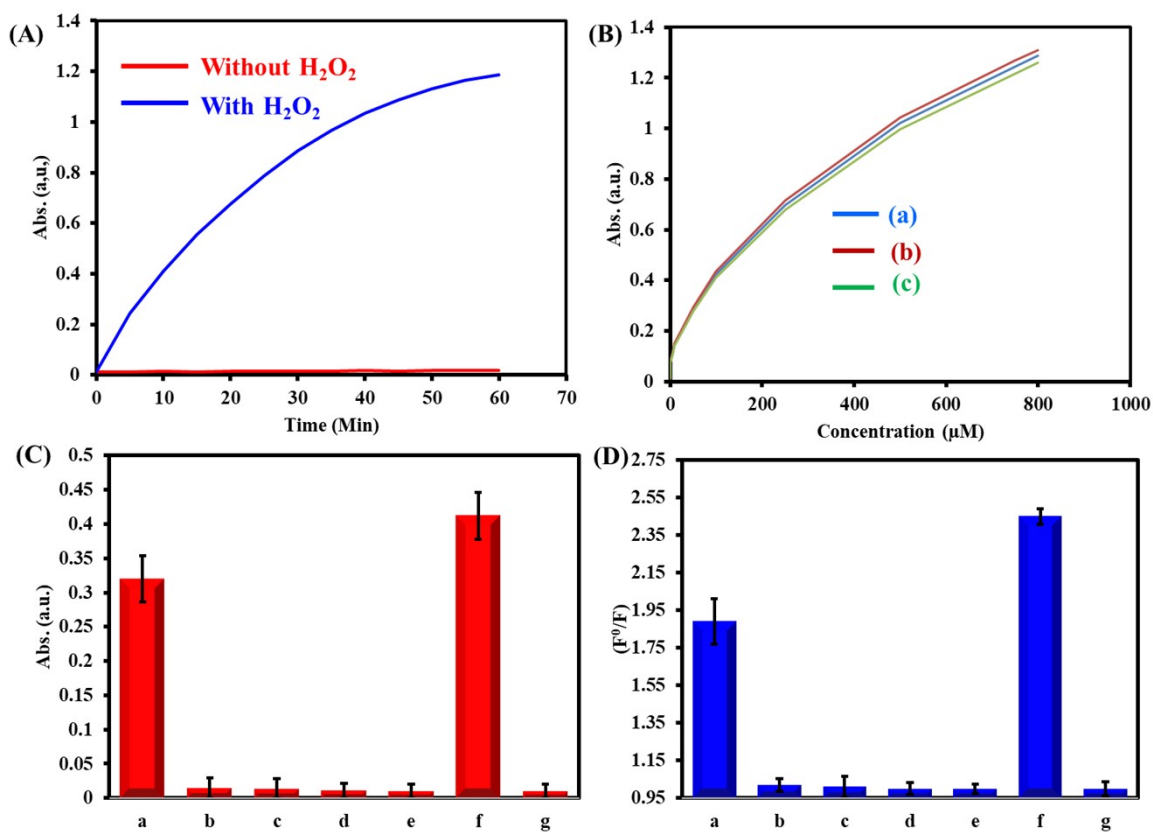

**Fig. S4** (A) Time course of absorbance at 512 nm (Cu,S@CDs without H<sub>2</sub>O<sub>2</sub>); (B) Oxygen dependence – lactate calibration curves under different O<sub>2</sub> conditions (a. Air-saturated: Dissolved O<sub>2</sub> ≈ 250 μM (ambient, no purge), b. O<sub>2</sub>-saturated: Purged with pure O<sub>2</sub> for 15 min, ≈ 1200 μM O<sub>2</sub>, c. Deoxygenated: Purged with N<sub>2</sub> for 15 min, ≈ 50 μM O<sub>2</sub>); (C) Colorimetric and (D) fluorometric component necessity tests (a. Lactate oxidase + lactate + Cu,S@CDs + phenol + 4-aminoantipyrine, b. Lactate oxidase, c. Without lactate, d. Without Cu,S@CDs, e. Without phenol + 4-AAP, e. H<sub>2</sub>O<sub>2</sub>+Cu,S@CDs + phenol + 4-aminoantipyrine, f. Buffer only).

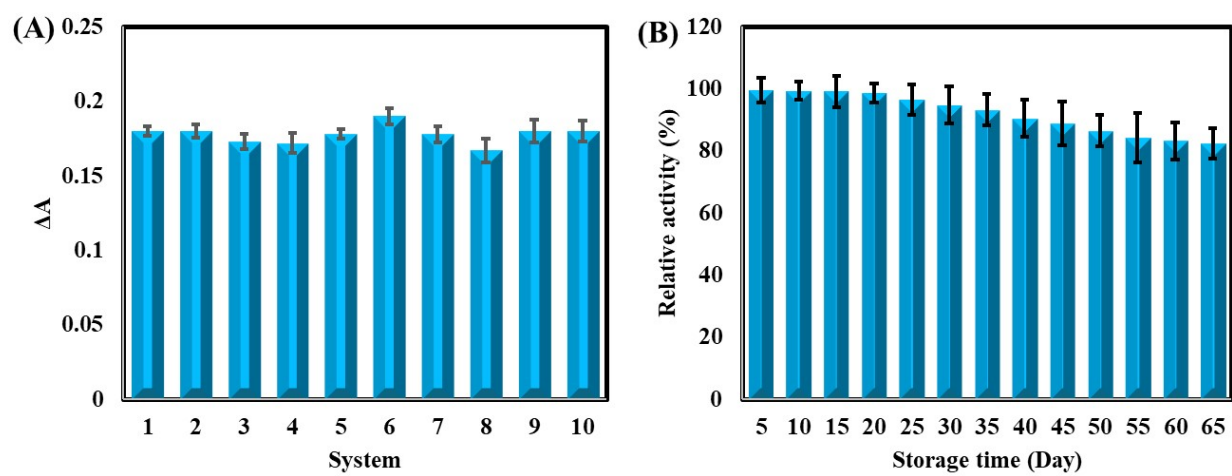

**Fig. S5** (A) Reproducibility and (B) stability of the system for measuring 30  $\mu\text{M}$  lactate. Number of replicates are three for all measurements.

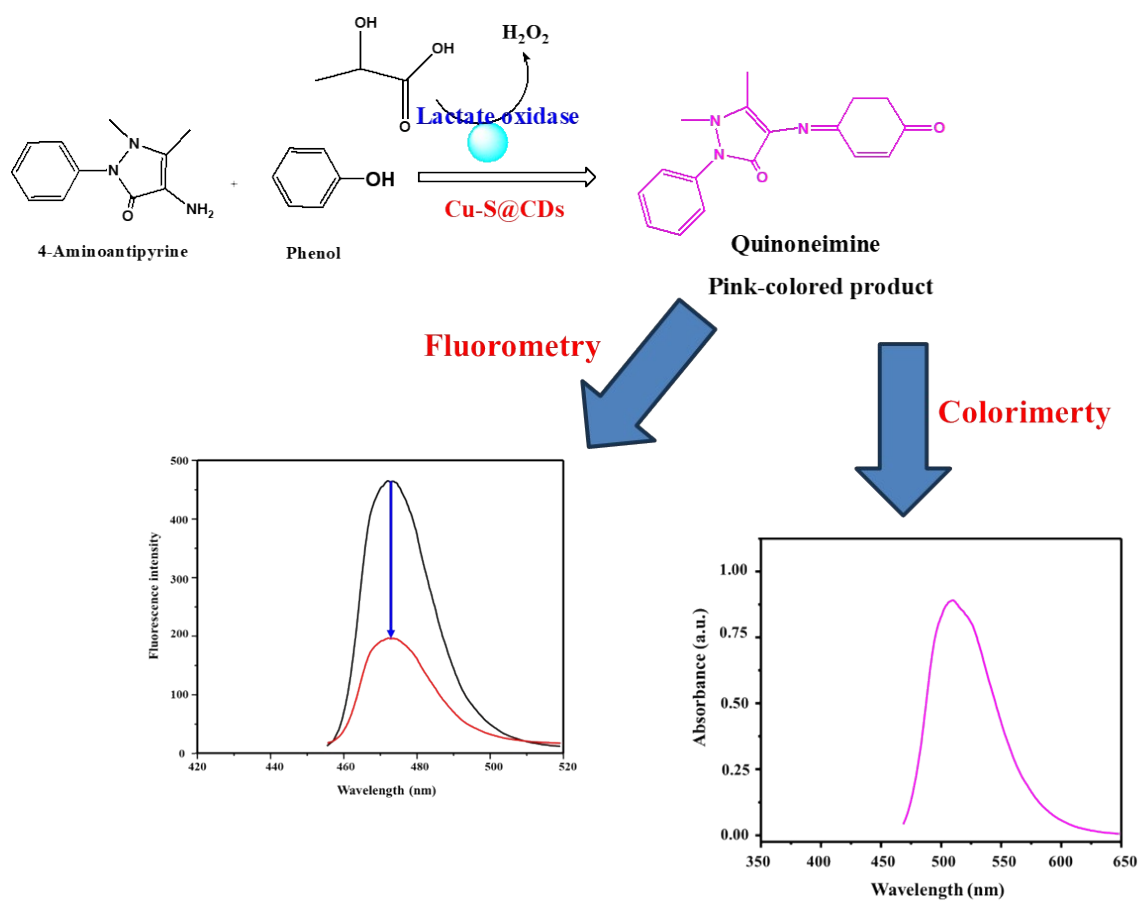

**Scheme S1.** Proposed dual-mode detection of lactate using Cu-S@CDs-based chromogenic system.

**Table S1.** Kinetic parameter comparison between Cu-S@CDs and other peroxidase-like catalysts.

| Catalyst                                | $K_m$ (mM) |                               | $V_{max}$ ( $10^{-8}$ M s $^{-1}$ ) |                               | Ref.             |
|-----------------------------------------|------------|-------------------------------|-------------------------------------|-------------------------------|------------------|
|                                         | TMB        | H <sub>2</sub> O <sub>2</sub> | TMB                                 | H <sub>2</sub> O <sub>2</sub> |                  |
| <b>Cu-S@CDs</b>                         | 0.121      | 0.188                         | 18.87                               | 16.68                         | <b>This work</b> |
| <b>HRP</b>                              | 0.434      | 3.70                          | 10.00                               | 8.71                          | [1]              |
| <b>Fe/Eu-MOF</b>                        | 0.115      | 0.113                         | 1.59                                | 3.82                          | [2]              |
| <b>Au/MOFs (Fe, Mn)/CNTs</b>            | 0.34       | 0.33                          | 3.38                                | 17.65                         | [3]              |
| <b>2D Ni/Fe MOF</b>                     | 0.411      | 0.037                         | 12.5                                | 3.30                          | [4]              |
| <b>Cu-CuFe<sub>2</sub>O<sub>4</sub></b> | 0.69       | 0.087                         | 16.87                               | 32.18                         | [5]              |

**Table S2** Steady-state kinetic parameters of Cu,S@CDs and HRP toward TMB and H<sub>2</sub>O<sub>2</sub>, including turnover number (k<sub>cat</sub>) and catalytic efficiency (k<sub>cat</sub>/K<sub>m</sub>).

| Catalyst | Substrate                     | K <sub>m</sub> (mM) | V <sub>max</sub> ( $\times 10^{-8}$ M·s <sup>-1</sup> ) | k <sub>cat</sub> (s <sup>-1</sup> ) | k <sub>cat</sub> /K <sub>m</sub> (M <sup>-1</sup> ·s <sup>-1</sup> ) |
|----------|-------------------------------|---------------------|---------------------------------------------------------|-------------------------------------|----------------------------------------------------------------------|
| Cu,S@CDs | TMB                           | 0.12                | 8.45                                                    | 6.45                                | $5.38 \times 10^4$                                                   |
| Cu,S@CDs | H <sub>2</sub> O <sub>2</sub> | 0.08                | 7.92                                                    | 6.05                                | $7.56 \times 10^4$                                                   |
| HRP      | TMB                           | 0.43                | 0.18                                                    | 0.14                                | $3.26 \times 10^2$                                                   |

**Table S3** Reproducibility of the colorimetric and fluorometric methods (n = 5).

| <b>Concentration<br/>(<math>\mu\text{M}</math>)</b> | <b>Colorimetric approach</b> |            |       | <b>Fluorometric approach</b> |            |       |
|-----------------------------------------------------|------------------------------|------------|-------|------------------------------|------------|-------|
|                                                     | Found<br>( $\mu\text{M}$ )   | Recovery % | RSD % | Found<br>( $\mu\text{M}$ )   | Recovery % | RSD % |
| <b>5.0</b>                                          | 5.23                         | 104.6      | 3.76  | 5.30                         | 106.0      | 3.67  |
| <b>100.0</b>                                        | 96.78                        | 96.8       | 2.78  | 104.87                       | 104.9      | 4.08  |
| <b>400.0</b>                                        | 405.80                       | 101.5      | 3.20  | 394.19                       | 98.5       | 3.66  |

**Table S4** Analytical performance of the Cu,S@CDs-based assay in buffer, serum, and sweat.

| Parameter           | Buffer (PBS, pH 7.4)                 | Human Serum (100× diluted)                              | Human Sweat (200× diluted)                              |
|---------------------|--------------------------------------|---------------------------------------------------------|---------------------------------------------------------|
| Linear range (μM)   | 0.02–800 (fluoro)<br>0.1–750 (color) | 0.05–800 (fluoro)<br>0.2–750 (color)                    | 0.1–800 (fluoro)<br>0.2–750 (color)                     |
| LOD (μM)            | 0.0025 (fluoro)<br>0.022 (color)     | 0.008 (fluoro)<br>0.035 (color)                         | 0.015 (fluoro)<br>0.050 (color)                         |
| LOQ (μM)            | 0.008 (fluoro)<br>0.07 (color)       | 0.025 (fluoro)<br>0.12 (color)                          | 0.050 (fluoro)<br>0.17 (color)                          |
| Slope (calibration) | 0.0014 (color)<br>0.0014 (fluoro)    | 0.00132 ± 0.00005 (color)<br>0.00135 ± 0.00004 (fluoro) | 0.00128 ± 0.00006 (color)<br>0.00130 ± 0.00005 (fluoro) |
| Matrix effect (%)   | –                                    | –5.7% (color)<br>–3.6% (fluoro)                         | –8.6% (color)<br>–7.1% (fluoro)                         |
| Intra-day RSD (%)   | <3%                                  | <4.5%                                                   | <5.5%                                                   |
| Inter-day RSD (%)   | <5%                                  | <7%                                                     | <8%                                                     |

$$\text{Matrix effect (\%)} = (\text{Slope}_{\text{matrix}} / \text{Slope}_{\text{buffer}} - 1) \times 100$$

**Table S5** Precision data for lactate determination in spiked serum and sweat (n=10).

| Matrix                       | Spiked Lactate ( $\mu\text{M}$ ) | Found ( $\mu\text{M}$ ) | Intra-day RSD (%) | Inter-day RSD (%) |
|------------------------------|----------------------------------|-------------------------|-------------------|-------------------|
| Serum (100 $\times$ diluted) | 5.0                              | 4.92 $\pm$ 0.18         | 3.7               | 5.2               |
|                              | 20.0                             | 19.85 $\pm$ 0.52        | 2.6               | 4.8               |
|                              | 100.0                            | 99.2 $\pm$ 2.8          | 2.8               | 5.1               |
| Sweat (200 $\times$ diluted) | 10.0                             | 9.78 $\pm$ 0.42         | 4.3               | 6.5               |
|                              | 50.0                             | 49.2 $\pm$ 2.1          | 4.3               | 6.8               |
|                              | 200.0                            | 198.5 $\pm$ 8.5         | 4.3               | 7.2               |

**Table S6** Correlation with reference method for serum samples (n=10).

| Parameter                         | Colorimetric mode  | Fluorometric mode  |
|-----------------------------------|--------------------|--------------------|
| Regression equation               | $y = 0.96x + 0.12$ | $y = 0.98x + 0.08$ |
| Correlation coefficient ( $R^2$ ) | 0.976              | 0.989              |
| Bias (%)                          | -4.2%              | -2.1%              |
| p-value (paired t-test)           | 0.18 (>0.05)       | 0.32 (>0.05)       |

**Table S7** Comparison with commercial sweat lactate kit (n=10).

| Sample         | Commercial kit ( $\mu\text{M}$ ) | Colorimetric ( $\mu\text{M}$ ) | Fluorometric ( $\mu\text{M}$ ) |
|----------------|----------------------------------|--------------------------------|--------------------------------|
| 1              | $15.2 \pm 1.1$                   | $14.8 \pm 0.9$                 | $15.0 \pm 0.8$                 |
| 2              | $28.5 \pm 2.0$                   | $27.9 \pm 1.5$                 | $28.2 \pm 1.3$                 |
| 3              | $42.1 \pm 2.5$                   | $41.5 \pm 2.0$                 | $41.8 \pm 1.8$                 |
| ...            | ...                              | ...                            | ...                            |
| Mean bias      | –                                | –4.2%                          | –2.8%                          |
| R <sup>2</sup> | –                                | 0.971                          | 0.985                          |

**Table S8** Quantitative comparison of single-mode versus dual-mode detection performance for lactate determination in serum and sweat.

| Parameter                                 | Colorimetric alone | Fluorometric alone | Dual-mode (consensus) | Improvement                                      |
|-------------------------------------------|--------------------|--------------------|-----------------------|--------------------------------------------------|
| False positive rate (serum, n=50)         | 8% (4/50)          | 6% (3/50)          | 0% (0/50)             | 100% reduction                                   |
| False positive rate (sweat, n=50)         | 12% (6/50)         | 10% (5/50)         | 2% (1/50)             | 83% reduction                                    |
| Effective dynamic range ( $\mu\text{M}$ ) | 0.1–750            | 0.02–500*          | 0.02–750**            | 30 $\times$ wider than fluoro alone <sup>†</sup> |
| Mean absolute error (serum, n=20)         | 5.8%               | 6.9%               | 2.7%                  | 53–61% reduction                                 |
| Mean absolute error (sweat, n=20)         | 7.4%               | 9.2%               | 3.4%                  | 54–63% reduction                                 |
| Outlier detection                         | No                 | No                 | Yes (6/100 flagged)   | New capability                                   |
| Samples requiring re-analysis             | Not identified     | Not identified     | 6% (6/100)            | Prevents erroneous results                       |

\*Fluorometric error exceeds 10% above 500  $\mu\text{M}$  due to inner filter saturation.

\*\*Combined range: use fluorometric for  $<50 \mu\text{M}$ , colorimetric for  $>50 \mu\text{M}$ .

<sup>†</sup>Compared to using fluorometric alone for concentrations  $>50 \mu\text{M}$ .

## References

1. L. Gao, J. Zhuang, L. Nie, J. Zhang, Y. Zhang, N. Gu, T. Wang, J. Feng, D. Yang, S. Perrett, X. Yan, Intrinsic peroxidase-like activity of ferromagnetic nanoparticles, *Nature Nanotechnology*, 2 (2007) 577-583.
2. W. Shi, T. Li, N. Chu, X. Liu, M. He, B. Bui, M. Chen, W. Chen, Nano-octahedral bimetallic Fe/Eu-MOF preparation and dual model sensing of serum alkaline phosphatase (ALP) based on its peroxidase-like property and fluorescence, *Materials Science and Engineering: C*, 129 (2021) 112404.
3. X. Dang, H. Zhao, Bimetallic Fe/Mn metal-organic-frameworks and Au nanoparticles anchored carbon nanotubes as a peroxidase-like detection platform with increased active sites and enhanced electron transfer, *Talanta*, 210 (2020) 120678.
4. Q. Li, Q. Wang, Y. Li, X. Zhang, Y. Huang, 2D bimetallic Ni/Fe MOF nanosheet composites as a peroxidase-like nanozyme for colorimetric assay of multiple targets, *Analytical Methods*, 13 (2021) 2066-2074.
5. F. Xia, Q. Shi, Z. Nan, Facile synthesis of Cu-CuFe<sub>2</sub>O<sub>4</sub> nanozymes for sensitive assay of H<sub>2</sub>O<sub>2</sub> and GSH, *Dalton Transactions*, 49 (2020) 12780-12792.
